# Supplementary material
Source: ML conference proceedings conference paper supplement (https://proceedings.neurips.cc/paper_files/paper/2018/hash/7f5d04d189dfb634e6a85bb9d9adf21e-Abstract.html)
Supplement: Supplementary file [file 7f5d04d189dfb634e6a85bb9d9adf21e-Supplemental.zip]

---

# Revisiting Multi-Task Learning with ROCK: a Deep Residual Auxiliary Block for Visual Detection

## Supplementary Material

---

**Taylor Mordan**<sup>(1, 2)</sup>  
taylor.mordan@lip6.fr

**Nicolas Thome**<sup>(3)</sup>  
nicolas.thome@cnam.fr

**Gilles Henaff**<sup>(2)</sup>  
gilles.henaff@fr.thalesgroup.com

**Matthieu Cord**<sup>(1)</sup>  
matthieu.cord@lip6.fr

(1) Sorbonne Université, CNRS, Laboratoire d’Informatique de Paris 6, LIP6  
F-75005 Paris, France

(2) Thales Land and Air Systems  
2 Avenue Gay-Lussac, 78990 Élancourt, France

(3) CEDRIC, Conservatoire National des Arts et Métiers  
292 Rue St Martin, 75003 Paris, France

## 1 Model architecture details

Our model is based on a ResNet-50 backbone with a dilation in the last block. ROCK block is applied on the *conv5* feature map, whose spatial dimensions are divided by 16 with respect to the input image (*i.e.*  $30 \times 40$  for  $480 \times 640$  inputs) with a width of 2048. The encoder is composed of two convolutions that are shared across all auxiliary tasks ( $1 \times 1$  and  $3 \times 3$  convolutions, both into 512 channels). The last convolution is  $1 \times 1$  but the number of output channels is task-dependent. It is  $S = 27$  for scene classification, 128 for depth estimation, and  $3 \times 128$  for surface normal estimation. The predictor is composed of pooling only. It is a global average pooling for scene predictions, and a channel-wise average pooling (*i.e.* reducing the width to 1) for depth predictions and for each one of the three components of surface normal predictions. The decoder consists in a  $1 \times 1$  convolution into 2048 channels for each task separately. All convolutions are followed by Batch Normalization [5] and ReLU modules, except for those just before predictors (last task-specific convolution of the encoder) that have linear activation functions. We then use a SSD detection block [9] with 6 additional prediction feature maps, learned with the same setup as in the original paper [9].

## 2 Experimental setup

Object detection is performed on the same 19 object classes as [2, 4] and is evaluated with three common metrics (mAP@0.5, mAP@0.75 and mAP@[0.5:0.95]) to thoroughly analyze proposed improvements. As additional auxiliary tasks, we use scene classification into  $S = 27$  scene classes, depth estimation and surface normal estimation. The ground truths for the first two tasks are provided along with NYUv2 dataset, and we use the targets computed by [11] for the normal prediction task.

We use the SSD framework [9] with a ResNet-50 [3] backbone architecture pre-trained on ImageNet [10]. Detection is performed on the output of the *conv5* block of ResNet (or its refined version when using our auxiliary block) and on 6 additional feature maps randomly initialized. We train the networks using Adam optimizer [6] with a batch size of 8 for 30,000 iterations with a learning

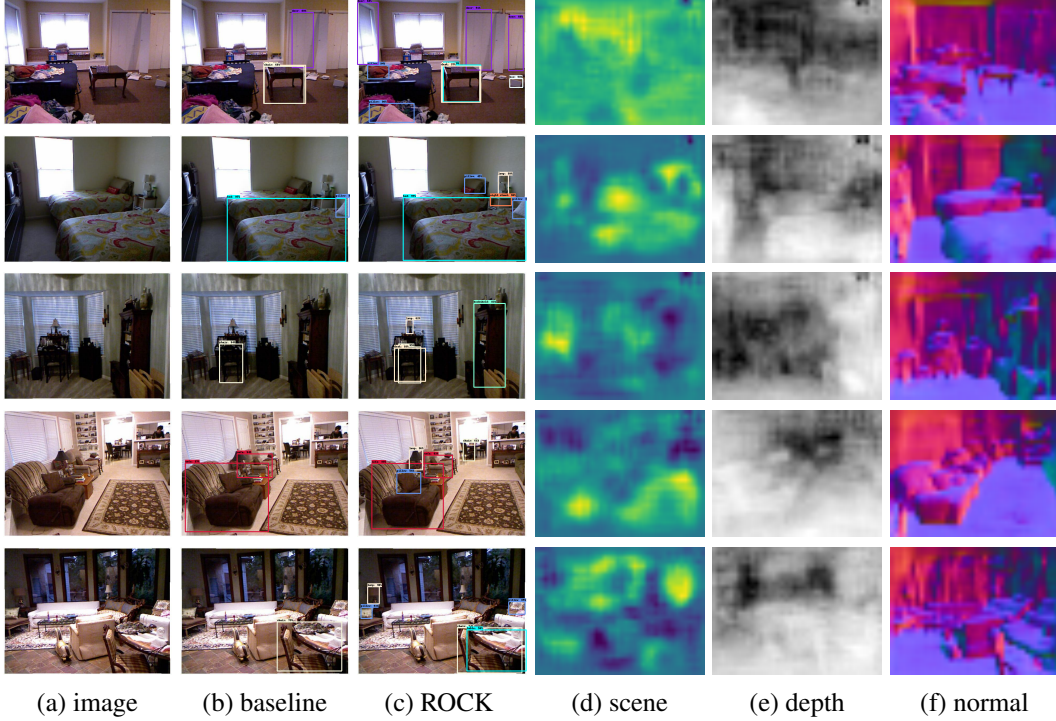

Figure 1: **Visualization of outputs.** The original images are presented in (a). Outputs of the detection baseline and ROCK are illustrated in (b) and (c) respectively. Column (d) depicts scene classification through heatmaps of ground truth scene classes (*i.e.* the maps just before global average pooling). Columns (e) and (f) show predictions for depth prediction and surface normal estimation respectively.

rate of  $5 \cdot 10^{-5}$ , then we lower it to  $5 \cdot 10^{-6}$  and keep training for 10,000 more iterations. We use the data augmentation from SSD [9] but with fixed aspect ratio for the crops. All examples are then resized to  $480 \times 640$  pixels, flipped with probability 0.5, and some color data augmentation [7] is finally applied. Annotations for depth and surface normal estimation are modified accordingly to keep geometries of the scenes (see [1] for details). Classification and localization losses have weights of 1 and 3 respectively. Loss weights of auxiliary tasks are set to 3 for scene classification and depth estimation, and to 30 for normal estimation (we use a factor of 10 for this task as advised by [1]). Finally, we use the same matching strategy and classification prior as [8], and post-process detections with NMS using a threshold of 0.3.

### 3 Visualization of results

Additional visualizations are given in [Figure 1](#).

### References

- [1] David Eigen and Rob Fergus. Predicting depth, surface normals and semantic labels with a common multi-scale convolutional architecture. In *Proceedings of the IEEE International Conference on Computer Vision (ICCV)*, pages 2650–2658, 2015. [2](#)
- [2] Saurabh Gupta, Ross Girshick, Pablo Arbeláez, and Jitendra Malik. Learning rich features from RGB-D images for object detection and segmentation. In *Proceedings of the IEEE European Conference on Computer Vision (ECCV)*, pages 345–360, 2014. [1](#)
- [3] Kaiming He, Xiangyu Zhang, Shaoqing Ren, and Jian Sun. Deep residual learning for image recognition. In *Proceedings of the IEEE Conference on Computer Vision and Pattern Recognition (CVPR)*, 2016. [1](#)

- [4] Judy Hoffman, Saurabh Gupta, and Trevor Darrell. Learning with side information through modality hallucination. In *Proceedings of the IEEE Conference on Computer Vision and Pattern Recognition (CVPR)*, pages 826–834, 2016. [1](#)
- [5] Sergey Ioffe and Christian Szegedy. Batch normalization: Accelerating deep network training by reducing internal covariate shift. In *Proceedings of the International Conference on Machine Learning (ICML)*, 2015. [1](#)
- [6] Diederik Kingma and Jimmy Ba. Adam: A method for stochastic optimization. In *Proceedings of the International Conference on Learning Representations (ICLR)*, 2015. [1](#)
- [7] Alex Krizhevsky, Ilya Sutskever, and Geoffrey E Hinton. ImageNet classification with deep convolutional neural networks. In *Advances in Neural Information Processing Systems (NIPS)*, 2012. [2](#)
- [8] Tsung-Yi Lin, Priya Goyal, Ross Girshick, Kaiming He, and Piotr Dollár. Focal loss for dense object detection. In *Proceedings of the IEEE International Conference on Computer Vision (ICCV)*, 2017. [2](#)
- [9] Wei Liu, Dragomir Anguelov, Dumitru Erhan, Christian Szegedy, and Scott Reed. SSD: Single shot multibox detector. In *Proceedings of the IEEE European Conference on Computer Vision (ECCV)*, 2016. [1](#), [2](#)
- [10] Olga Russakovsky, Jia Deng, Hao Su, Jonathan Krause, Sanjeev Satheesh, Sean Ma, Zhiheng Huang, Andrej Karpathy, Aditya Khosla, Michael Bernstein, Alexander Berg, and Li Fei-Fei. ImageNet large scale visual recognition challenge. *International Journal of Computer Vision (IJCV)*, 115(3):211–252, 2015. [1](#)
- [11] Nathan Silberman, Derek Hoiem, Pushmeet Kohli, and Rob Fergus. Indoor segmentation and support inference from RGBD images. In *Proceedings of the IEEE European Conference on Computer Vision (ECCV)*, 2012. [1](#)
